## **Identifying Contextual and Spatial Risk Factors for Post-Acute Sequelae of SARS-CoV-2 Infection: An EHR-based Cohort Study from the RECOVER Program**

Yongkang Zhang<sup>a\*</sup>; Hui Hu<sup>b\*</sup>; Vasilios Fokaidis<sup>a</sup>; Colby Lewis V<sup>a</sup>; Jie Xu<sup>c</sup>; Chengxi Zang<sup>a</sup>; Zhenxing Xu<sup>a</sup>; Fei Wang<sup>a</sup>; Michael Koropsak<sup>a</sup>; Jiang Bian<sup>c</sup>; Jaclyn Hall<sup>c</sup>; Russell L. Rothman<sup>d</sup>; Elizabeth A. Shenkman<sup>e</sup>; Wei-Qi Wei<sup>e</sup>; Mark G. Weiner<sup>a</sup>; Thomas W. Carton<sup>f</sup>; Rainu Kaushal<sup>a</sup>

- a. Department of Population Health Sciences, Weill Cornell Medicine, New York, NY
- b. Channing Division of Network Medicine, Brigham and Women's Hospital and Harvard Medical School, Boston, MA
- c. Department of Health Outcomes Biomedical Informatics, University of Florida, Gainesville, FL,
- d. Department of Pediatrics, Vanderbilt University Medical Center, Nashville, TN
- e. Department of Biomedical Informatics, Vanderbilt University Medical Center, Nashville, TN
- f. Louisiana Public Health Institute, New Orleans, LA

\* Drs. Zhang and Hu have equal contributions to this study and are joint first authors.

### **Corresponding Author:**

Yongkang Zhang, PhD  
Department of Population Health Sciences  
Weill Cornell Medical College  
402 East 67th Street  
New York, NY 10065  
yoz2009@med.cornell.edu  
646-962-8057

1 **Identifying Contextual and Spatial Risk Factors for Post-Acute Sequelae of SARS-CoV-2 Infection:**  
2 **An EHR-based Cohort Study from the RECOVER Program**

3 **Abstract**<sup>1</sup>

4 Post-acute sequelae of SARS-CoV-2 infection (PASC) affects a wide range of organ systems among a  
5 large proportion of patients with SARS-CoV-2 infection. Although studies have identified a broad set of  
6 patient-level risk factors for PASC, little is known about the contextual and spatial risk factors for PASC.  
7 Using electronic health data of patients with COVID-19 from two large clinical research networks in New  
8 York City and Florida, we identified contextual and spatial risk factors from nearly 200 environmental  
9 characteristics for 23 PASC symptoms and conditions of eight organ systems. We conducted a two-phase  
10 environment-wide association study. In Phase 1, we ran a mixed effects logistic regression with 5-digit  
11 ZIP Code tabulation area (ZCTA5) random intercepts for each PASC outcome and each contextual and  
12 spatial factor, adjusting for a comprehensive set of patient-level confounders. In Phase 2, we ran a mixed  
13 effects logistic regression for each PASC outcome including all significant (false positive discovery  
14 adjusted p-value < 0.05) contextual and spatial characteristics identified from Phase I and adjusting for  
15 confounders. We identified air toxicants (e.g., methyl methacrylate), criteria air pollutants (e.g., sulfur  
16 dioxide), particulate matter (PM<sub>2.5</sub>) compositions (e.g., ammonium), neighborhood deprivation, and built  
17 environment (e.g., food access) that were associated with increased risk of PASC conditions related to  
18 nervous, respiratory, blood, circulatory, endocrine, and other organ systems. Specific contextual and  
19 spatial risk factors for each PASC condition and symptom were different across New York City area and  
20 Florida. Future research is warranted to extend the analyses to other regions and examine more granular  
21 contextual and spatial characteristics to inform public health efforts to help patients recover from SARS-  
22 CoV-2 infection.

23 **Key Words**

24 SARS-CoV-2 infection; Long-COVID; Air pollution; Neighborhood deprivation; Built environment

---

<sup>1</sup> Abbreviations: PASC, post-acute sequelae of SARS-CoV-2 infection; COVID-19, the 2019 novel coronavirus disease; US, the United States; ZCTA5, 5-digit ZIP Code tabulation area; CRN, clinical research network; PCORnet, the National Patient-Centered Clinical Research Network; PM<sub>2.5</sub>, fine particulate matter with diameters that are 2.5 μm and smaller; CO, carbon monoxide; SO<sub>2</sub>, sulfur dioxide; NO<sub>2</sub>, nitrogen dioxide; SO<sub>4</sub><sup>2-</sup>, sulfate; NH<sub>4</sub><sup>+</sup>, ammonium; NO<sub>3</sub><sup>-</sup>, nitrate; OM, organic matter; BC, black carbon; DUST, mineral dust; SS, sea-salt; O<sub>3</sub>, ozone; ACAG, The University of Washington at St. Louis Atmospheric Composition Analysis Group; CACES, The Center for Air, Climate, & Energy Solutions; US EPA, The United States Environmental Protection Agency; JHU CSSE, Johns Hopkins University, Center for Systems Science and Engineering Coronavirus Resource Center; CDC, The Centers for Disease Control and Prevention; NATA, National Air Toxics Assessment; USDA, US Department of Agriculture; HUD, Department of Housing and Urban Development; USPS, US Postal Service; NACIS, The North American Industry Classification System; NDVI, Normalized Difference Vegetation Index; NDI, Neighborhood Deprivation Index; ED: emergency department; VIF: variance inflation factor.

## 25 **1. Introduction**

26 Post-acute sequelae of SARS-CoV-2 infection (PASC) refers to ongoing, relapsing, or new  
27 symptoms occurring after the acute phase of SARS-CoV-2 infection. Approximately one in five  
28 individuals aged 18-64 and one in four individuals aged 65 or older experience potential PASC symptoms  
29 and conditions following acute SARS-CoV-2 infection (Bull-Otterson et al., 2022). Studies have  
30 identified PASC symptoms and conditions that affect multiple organ systems, including shortness of  
31 breath (Al-Aly et al., 2021; Bell et al., 2021; Taquet et al., 2021; Wang et al., 2022), fatigue (Al-Aly et  
32 al., 2021; Bell et al., 2021; Cohen et al., 2022; Shoucri et al., 2021), cognitive dysfunction (Blomberg et  
33 al., 2021; Davis et al., 2021; Taquet et al., 2021), pulmonary diseases (Cohen et al., 2022), cardiovascular  
34 diseases (Davis et al., 2021), diabetes (Cohen et al., 2022), and mental health conditions (Cohen et al.,  
35 2022; Taquet et al., 2021; Wang et al., 2022). As the number of individuals with SARS-CoV-2 infection  
36 keeps growing, understanding, treating, and preventing PASC conditions and symptoms have become a  
37 priority to help patients recover completely from SARS-CoV-2 infection.

38 Incidence and severity of PASC symptoms and conditions vary significantly among COVID-19  
39 patients (Groff et al., 2021; Xie et al., 2021). A critical public health objective is to identify key factors  
40 that contribute to a higher risk of PASC symptoms and conditions following SARS-CoV-2 infection.  
41 Such evidence is important to help prioritize preventions and treatment strategies and improve health  
42 equity (Sudre et al., 2021; Yoo et al., 2022). Recent studies have identified a set of patient-level risk  
43 factors for PASC among COVID-19 patients, including female sex (Bliddal et al., 2021; Sudre et al.,  
44 2021), higher body mass index (Bliddal et al., 2021; Sudre et al., 2021), older age (Carvalho-Schneider et  
45 al., 2021; Petersen et al., 2021), preexisting comorbidities (Su et al., 2022; Thompson et al., 2022),  
46 minority race/ethnicity (Halpin et al., 2021), and severity of acute SARS-CoV-2 infection (Carvalho-  
47 Schneider et al., 2021; Sudre et al., 2021). However, little is known about the environmental  
48 characteristics associated with PASC.

49 Disadvantaged contextual and spatial characteristics, such as air pollution, social vulnerability,  
50 and poor built environment, have long been recognized as risk factors for viral respiratory infections  
51 (Diez Roux, 2001; Pica & Bouvier, 2012; Smith et al., 1999). A growing body of evidence has  
52 established strong associations between contextual and spatial risk factors (e.g., exposures to air  
53 pollutants and chemicals) and increased risk of incidence and mortality of SARS-CoV-2 infection (H. Hu  
54 et al., 2021; Weaver et al., 2022; Wu et al., 2020; Zhou et al., 2021). Recent research examined a limited  
55 set of contextual and spatial risk factors for PASC. For example, one study examined the association  
56 between the Social Vulnerability Index (SVI) and PASC using a sample of 1,000 COVID-19 patients  
57 from a single health system and found no differences in the likelihood of PASC between patients with

58 higher and lower levels of SVI (Yoo et al., 2022). As individuals are exposed to multiple disadvantaged  
59 contextual and spatial factors simultaneously, more research is warranted to examine the totality of the  
60 environment using COVID-19 patients from geographically diverse regions. Leveraging two large cohorts  
61 of COVID-19 patients in New York City metropolitan area and Florida, we aimed to identify contextual  
62 and spatial risk factors for a broader set of PASC symptoms and conditions associated with SARS-CoV-2  
63 infection.

## 64 **2. Materials and methods**

### 65 2.1. Data Source and Setting

66 We conducted a retrospective cohort study using electronic health record (EHR) data from two  
67 large clinical research networks (CRNs) of PCORnet, including INSIGHT and OneFlorida+. PCORnet is  
68 a network of healthcare systems that facilitates multi-site research using EHR data. The network utilizes a  
69 common data model that fosters interoperability across participating sites. The INSIGHT CRN collects  
70 data from five academic health systems in New York City, covering a diverse patient population in the  
71 New York City Metropolitan Area (Kaushal et al., 2014). The OneFlorida+ is a partnership of 14  
72 academic institutions and health systems across Florida, Georgia, and Alabama with longitudinal patient-  
73 level EHR data for approximately 20 million patients (Shenkman et al., 2018). Using COVID-19 patients  
74 from two regions with different social and environmental conditions helped to demonstrate the  
75 heterogeneity of contextual and spatial characteristics associated with PASC conditions.

### 76 2.2 Study Sample

77 We identified COVID-19 positive patients as those with a positive SARS-CoV-2 PCR/antigen  
78 test or COVID-19 diagnosis (U07.1, U07.2, J12.81, B34.2, B97.2, B97.21, U04, and U04.9) between  
79 March 1<sup>st</sup>, 2020 and October 31<sup>st</sup>, 2021 in both CRNs. We included COVID-19-related diagnosis codes in  
80 addition to positive laboratory test results because patients could have received a positive SARS-CoV-2  
81 test outside CRN affiliated health systems or at home and only a diagnosis code was observed in EHR  
82 data. We identified COVID-19 negative patients as those with a negative PCR/antigen test, no positive  
83 tests, and/or no COVID-19-related diagnosis codes during the same period. We defined the date of first  
84 positive or negative PCR/antigen test or COVID-19 diagnosis as the index date.

85 This study focused on PASC symptoms and conditions among adult patients. Patients were  
86 included if they were 20 years or older, had at least one clinical encounter 3 years to 7 days before the  
87 index date (baseline period), and had at least one encounter 31-180 days after the index date (follow-up  
88 period). This requirement was necessary to observe symptoms and conditions in the pre-test period and

89 allow us to identify patients with incident new conditions and symptoms after SARS-CoV-2 infection.  
90 We were also able to account for baseline demographics (e.g., age and gender) and comorbidities as  
91 confounders in the analysis. We further restricted patients to those with a 5-digit residential zip-code in  
92 EHR data. We cross-walked 5-digit zip code to 5-digit zip-code tabulation areas (ZCTA5) and only  
93 included patients from a ZCTA5 with at least ten patients. eFigures 1&2 in the appendix represented the  
94 catchment areas of our sample in New York and Florida.

### 95 2.3. Defining PASC

96 We included 23 PASC symptoms and conditions that were identified from our previous study  
97 based on existing literature, input from clinical experts, and data-driven analytics (Zang et al., 2022). A  
98 detailed description of methods of identifying these PASC symptoms and conditions was reported  
99 separately (Zang et al., 2022). These symptoms and conditions are categorized into the following eight  
100 organ systems: nervous system (encephalopathy, dementia, cognitive problems, sleep disorders, and  
101 headache), skin (hair loss and pressure ulcer of skin), respiratory system (pulmonary fibrosis, dyspnea,  
102 and acute pharyngitis), circulatory system (pulmonary embolism, thromboembolism, chest pain, and  
103 abnormal heartbeat), blood (anemia), endocrine (malnutrition, diabetes mellitus, fluid disorders, and  
104 edema), digestive system (constipation and abdominal pain), and general signs and symptoms (malaise  
105 and fatigue and joint pain). We examined contextual and spatial characteristics associated with having at  
106 least one PASC condition or symptom in each organ system as well as characteristics associated with  
107 each individual PASC condition and symptom.

### 108 2.4. Contextual and Spatial Characteristics

109 We integrated a variety of contextual and spatial measures from multiple sources to characterize  
110 patients' exposures to their surrounding natural, built, and social environments before acute SARS-CoV-2  
111 infection. Table 1 presents a summary of these contextual and spatial factors, along with the  
112 corresponding data sources. To account for the heterogeneous spatiotemporal scales of these factors, area-  
113 and time-weighted averages were generated to aggregate them at the ZCTA5 level. We considered a total  
114 of 259 factors covering three domains of contextual and spatial characteristics with ten categories. A  
115 complete list of factors is in the appendix (eTable 1).

116

117

**Table 1 Summary of ZCTA5-level contextual and spatial characteristics**

|                                | Data Source and Validation Study | Year       | Original Spatial/ Temporal Scale | # of Measures | Example Measures                                                                              |
|--------------------------------|----------------------------------|------------|----------------------------------|---------------|-----------------------------------------------------------------------------------------------|
| <b>Natural Environment</b>     |                                  |            |                                  |               |                                                                                               |
| PM <sub>2.5</sub> compositions | ACAG                             | 2015-2017  | 0.01°/1-month                    | 7             | Sulfate, nitrate, ammonium, etc.                                                              |
| Criteria air pollutants        | CACES                            | 2015       | BG/1-year                        | 6             | PM <sub>2.5</sub> , O <sub>3</sub> , PM <sub>10</sub> , NO <sub>2</sub> , CO, SO <sub>2</sub> |
| Air toxicants                  | EPA NATA                         | 2014       | CT/1-year                        | 140           | Acrolein, propylene oxide                                                                     |
| <b>Built Environment</b>       |                                  |            |                                  |               |                                                                                               |
| Vacant land                    | US HUD                           | 2015-2019  | CT/3-month                       | 18            | Average days addresses vacant                                                                 |
| Walkability                    | National Walkability Index       | 2015       | BG/CS                            | 1             | Walkability Index                                                                             |
| Food Access                    | USDA FARA                        | 2015, 2019 | CT/1-year                        | 43            | Percent of low-access population at 1 mile                                                    |
| Green Space                    | NASA MODIS                       | 2015-2019  | 1000m/1-month                    | 1             | Normalized difference vegetation index                                                        |
| <b>Social Environment</b>      |                                  |            |                                  |               |                                                                                               |
| Neighborhood Deprivation       | ACS                              | 2015-2019  | ZCTA5/5-year                     | 1             | Neighborhood deprivation index                                                                |
| Social Capital                 | CBP                              | 2015-2019  | ZCTA5/1-year                     | 10            | Religious, civic, and social organizations                                                    |
| Crime and Safety               | UCR                              | 2015-2016  | County/1-year                    | 32            | Burglary rate, aggravated assault rate                                                        |

118 Notes: BG: Census Block Group; CT: Census Tract; CS: Cross-sectional; ACAG: Atmospheric Composition Analysis  
 119 Group; CACES: Center for Air, Climate, & Energy Solutions; EPA: Environmental Protection Agency; NATA:  
 120 National Air Toxics Assessment; HUD: Department of Housing and Urban Development; USDA: US Department of  
 121 Agriculture; FARA: Food Access Research Atlas; NASA: National Aeronautics and Space Administration; MODIS:  
 122 Moderate Resolution Imaging Spectroradiometer; ACS: American Community Survey; CBP: Census Business Pattern;  
 123 UCR: Uniform Crime Reporting.

124

125 2.4.1. Natural Environment

126 Natural environment factors include compositions of particulate matter with diameters that are  
 127 2.5 μm and smaller (PM<sub>2.5</sub> compositions), criteria air pollutants, and air toxicants. These factors could  
 128 increase the risk of developing PASC by directly leading to certain conditions (e.g., respiratory diseases)  
 129 or making individuals more susceptible to SARS-CoV-2 infection (e.g., exacerbate infection severity)  
 130 (Weaver et al., 2022).

131 Data on PM<sub>2.5</sub> compositions were obtained from the University of Washington at St. Louis  
 132 Atmospheric Composition Analysis Group (ACAG) (van Donkelaar et al., 2019). ACAG estimated  
 133 annual PM<sub>2.5</sub> and its compositions at a spatial resolution of 0.01 degree in longitude and latitude. The  
 134 estimates were derived using data from a chemical transport model (GEOS-Chem) and satellite  
 135 observations of aerosol optical depth statistically fused by geographically-weighted models that have been  
 136 extensively cross-validated (van Donkelaar et al., 2019).

137 We obtained criteria air pollutants, such as PM<sub>10</sub> and carbon monoxide, from the Center for Air,  
138 Climate, & Energy Solutions (CACES) (S. Y. Kim et al., 2020). These measures were derived at the  
139 census block group level using data from the US Environmental Protection Agency (EPA) regulatory  
140 monitors, land use, and satellite-derived estimates of air pollution with well-validated land use regression  
141 models (S. Y. Kim et al., 2020). Finally, we obtained air toxicant measures from the National Air Toxics  
142 Assessment (NATA) conducted by EPA based on a national emissions inventory of outdoor air toxics  
143 sources (Logue et al., 2011). We used the most recent NATA data released in 2018 representing air  
144 conditions in 2014 at the census tract level. These measures represent long-term exposures rather than  
145 acute exposures to hazardous air pollutants (H. Hu et al., 2021; Petroni et al., 2020). Previous research  
146 indicates that spatial distribution of these air pollutants may have remained relatively unchanged  
147 (Chakraborty, 2021).

#### 148 2.4.2. Built Environment

149 Built environment factors, including vacant land, walkability, food access, and green space, were  
150 considered. These are important determinants to various symptoms and conditions that may be associated  
151 with SARS-CoV-2 infection. For example, better access to healthy food mitigates the risk of developing  
152 diabetes associated with SARS-CoV-2 infection (Kirby et al., 2021). Green space in neighborhood could  
153 reduce the risk of developing respiratory conditions (Tischer et al., 2017).

154 We obtained census-tract level vacant land measures in the period of 2015-2019 from the US  
155 Department of Housing and Urban Development (Garvin et al., 2013). We used the National Walkability  
156 Index developed by EPA, which measures walkability on a scale from 1 to 20 for each census block  
157 group, with 1 indicating the least walkable block group and 20 indicating the most walkable block group  
158 (Watson et al., 2020). Food access measures were obtained from the US Department of Agriculture  
159 (USDA)'s Food Environment Atlas (United States Department of Agriculture, 2019). We used 43 food  
160 access measures at the census-tract level of 2015 and 2019. Finally, we obtained the Normalized  
161 Difference Vegetation Index (NDVI) as a measure of green space in a neighborhood (Rhew et al., 2011).  
162 NDVI is a validated measure based on remote-sensing spectral data from NASA Moderate Resolution  
163 Imaging Spectroradiometer.

#### 164 2.4.3. Social Environment

165 We measured neighborhood deprivation, social capital, and crime and safety for neighborhood  
166 social environment (Table 1 and eTable 1). These measures represent important socioeconomic  
167 conditions that are associated with individuals' health and various conditions.

168           The Neighborhood Deprivation Index (NDI) was used to characterize neighborhood  
169 socioeconomic status. NDI is a weighted average of 20 measures that represent seven domains of  
170 neighborhood deprivation, including poverty, occupation, housing, employment, education, racial  
171 composition, and residential stability. We extracted ZCTA5-level data for all 20 measures from the  
172 American Community Survey five-year estimates of 2015-2019 and derived NDI for New York, New  
173 Jersey, and Florida using an established method (Walker et al., 2020). Ten social capital measures were  
174 constructed based on the North American Industry Classification System (NAICS) codes using the 2015-  
175 2019 Census Business Pattern data at the ZCTA5-level (Rupasingha et al., 2006). Finally, we obtained  
176 county-level crime and safety measures from the Uniform Crime Reporting Program (Table 1 and eTable  
177 1).

## 178 2.5. Covariates

179           We examined a comprehensive set of patient characteristics as potential confounders using EHR  
180 data. These included patient age (20-39 [ref.], 40-54, 55-64, 65-74, 75-84, and 85+); gender (female  
181 [ref.], male, and other/missing); race (White [ref.], Black, Asian, and other or missing); ethnicity  
182 (Hispanic [ref.], Non-Hispanic, and Missing); year-month indicators of COVID-19 positive testing  
183 (March 2020 through October 2021); baseline comorbidities; and indicators for the institutions  
184 contributing data. We used a revised list of Elixhauser comorbidities for pre-existing comorbidities,  
185 including alcohol abuse, anemia, arrhythmia, asthma, cancer, chronic kidney disease, chronic pulmonary  
186 disorders, cirrhosis, coagulopathy, congestive heart failure, COPD, coronary artery disease, dementia,  
187 type 1 diabetes, type 2 diabetes, end stage renal disease on dialysis, hemiplegia, HIV, hypertension, ,  
188 inflammatory bowel disorder, lupus or systemic lupus erythematosus, mental health disorders, multiple  
189 sclerosis, Parkinson's disease, peripheral vascular disorders, pregnant, pulmonary circulation disorder,  
190 rheumatoid arthritis, seizure/epilepsy, severe obesity (BMI  $\geq 40$  kg/m<sup>2</sup>), and weight loss. Each  
191 comorbidity was identified using ICD-10-CM diagnosis codes. We also adjusted for hospitalization status  
192 for SARS-CoV-2 infection as a proxy for COVID-19 severity. Hospitalized patients were those with a  
193 hospitalization encounter in the day prior through the 16 days following the index test date whereas non-  
194 hospitalized patients were those with only an ambulatory or ED encounter in the day prior through the 16  
195 days following the index test date.

## 196 2.6. Statistical Analysis

197           For all COVID-19 positive patients, we calculated the incidence of having at least one PASC  
198 condition in each organ system (e.g., having at least one nervous PASC condition), as well as incidence of  
199 each individual PASC condition. To calculate incidence of PASC for each organ system, we first included



200 patients without any diagnosis of PASC conditions in that organ system during the baseline period (i.e., 3  
201 years to 7 days before the index date). Among these patients, for each organ system we identified those  
202 with at least one diagnosis of PASC conditions during the follow-up period (i.e., 31-180 days after the  
203 index date). The incidence of PASC condition of each organ system was then calculated by dividing the  
204 number of patients in step 1 by the number of patients in step 2. Incidence of each individual PASC  
205 condition was calculated using same method by including patients without any diagnosis of a given PASC  
206 condition during the baseline period and identifying those with at least one diagnosis of that PASC  
207 condition during the follow-up period.

208 We derived all the 259 contextual and spatial measures for ZCTA5s in New York, New Jersey,  
209 and Florida, and merged them with EHR data of INSIGHT and OneFlorida+ CRNs. We excluded  
210 measures with five or fewer unique non-zero and non-missing values, indicating little variations in these  
211 measures across ZCTA5s in our sample. This approach led to the exclusion of 63 measures in INSIGHT  
212 sample and 55 in OneFlorida+ sample (eTable 2). The remaining 196 measures in INSIGHT and 204 in  
213 OneFlorida+ were included in our analysis. We standardized all continuous measures to account for  
214 different scales of these measures and easier interpretation.

215 We performed a two-phase environment-wide association study based on multiple regressions  
216 using all COVID-19 positive patients (H. Hu et al., 2021; Lin et al., 2019). We started with a data  
217 engineering process including deriving contextual and spatial measures and data linkage as mentioned  
218 above. Then in the Phase 1 analysis, we ran a single regression model for each PASC outcome (including  
219 23 individual PASC conditions and 8 PASC groups by organ system). Each regression included one  
220 contextual or spatial factor while controlling for all covariates described above. We used mixed effects  
221 logistic regressions with a random intercept for each ZCTA5. We used the false discovery rate (FDR)  
222 adjusted p values (q values) to account for multiple testing. A contextual or spatial factor was considered  
223 significant if the q-value is  $< 0.05$ .

224 In Phase 2, we ran a single mixed effects logistic regression with ZCTA5 random intercepts for  
225 each PASC outcome including all the significant contextual and spatial factors identified in Phase 1,  
226 adjusting for the same set of patient level covariates. We calculated the variance inflation factor (VIF) for  
227 each PASC outcome to examine multicollinearity among all significant contextual and spatial factors and  
228 excluded factors with a VIF of 10 or higher. We identified contextual and spatial risk factors for each  
229 PASC outcome as those with a statistically significant adjusted odds ratio  $> 1$  ( $P < 0.05$ ).

230 Contextual and spatial characteristics could be risk factors among all patients, regardless of  
231 COVID-19 status. For example, COVID-19 negative patients could also develop respiratory conditions

232 after long-term exposures to air pollutants. We therefore performed an additional analysis to examine the  
 233 excessive risk of contextual and spatial characteristics for PASC symptoms and conditions among  
 234 COVID-19 positive patients compared with negative patients. For each PASC outcome, we included both  
 235 COVID-19 positive and negative patients and ran a single mixed effects logistic regression. Each  
 236 regression included all the significant contextual and spatial risk factors identified from Phase 2 analysis,  
 237 an indicator of COVID-19 status, an interaction term between each contextual and spatial risk factor and  
 238 COVID-19 status, all other covariates, and ZCTA5 random intercepts. We identified contextual and  
 239 spatial factors with excessive risk for COVID-19 positive patients if the interaction term between this  
 240 factor and COVID-19 status  $> 1$  and was statistically significant ( $P < 0.05$ ). All analyses were done using  
 241 R.

242 This study was approved by the Institutional Review Boards of Weill Cornell Medicine (21-10-  
 243 95-380) and University of Florida (IRB202001831).

### 244 3. Results

#### 245 3.1. Patient Characteristics

246 We included 65,472 COVID-19 patients from the INSIGHT CRN and 35,023 from the  
 247 OneFlorida+ CRN (Table 2). OneFlorida+ had a higher proportion of patients under 65 than INSIGHT  
 248 (78% vs 70%,  $P < 0.001$ ). Both CRNs had more female patients (60% or higher) than male patients (40%  
 249 or lower). INSIGHT included a lower proportion of Black patients (18% vs 31%,  $P < 0.001$ ) but a higher  
 250 proportion of Hispanic patients (25% vs 17%,  $P < 0.001$ ). A higher proportion of COVID-19 patients  
 251 were hospitalized in OneFlorida+ than INSIGHT (25% vs 19%,  $P < 0.001$ ). More patients from INSIGHT  
 252 tested positive for SARS-CoV-2 in early waves of the pandemic than patients from OneFlorida+. Nearly  
 253 30% of INSIGHT patients tested positive in March to June 2020, as compared to 12% in OneFlorida+.  
 254 Overall, patients from OneFlorida+ had a higher burden of baseline comorbidities compared with patients  
 255 from INSIGHT (Table 2).

256 **Table 2 Baseline Characteristics of COVID-19 Positive Patients from INSIGHT and OneFlorida+**

| Demographics and baseline comorbidities | INSIGHT<br>(N = 65,427) | OneFlorida+<br>(N = 35,023) | P value |
|-----------------------------------------|-------------------------|-----------------------------|---------|
| <b>Demographics</b>                     |                         |                             |         |
| <b>Age categories, N (%)</b>            |                         |                             |         |
| 20-<40 years                            | 15,958 (24.4)           | 11,692 (33.4)               | < 0.001 |
| 40-<55 years                            | 15,969 (24.4)           | 9,015 (25.7)                | < 0.001 |
| 55-<65 years                            | 14,086 (21.5)           | 6,507 (18.6)                | < 0.001 |
| 65-<75 years                            | 11,136 (17.0)           | 4,254 (12.1)                | < 0.001 |
| 75-<85 years                            | 6,117 (9.3)             | 2,489 (7.1)                 | < 0.001 |
| 85+ years                               | 2,161 (3.3)             | 1,066 (3.0)                 | 0.03    |

|                                         |               |               |         |
|-----------------------------------------|---------------|---------------|---------|
| <b>Sex, N (%)</b>                       |               |               |         |
| Female                                  | 39,212 (59.9) | 22,818 (65.2) | < 0.001 |
| Male                                    | 26,215 (40.1) | 12,205 (34.8) | < 0.001 |
| <b>Race, N (%)</b>                      |               |               |         |
| Asian                                   | 2,972 (4.5)   | 477 (1.4)     | < 0.001 |
| Black or African American               | 11,887 (18.2) | 10,783 (30.8) | < 0.001 |
| White                                   | 28,052 (42.9) | 17,460 (49.9) | < 0.001 |
| Other <sup>1</sup>                      | 15,836 (24.2) | 5,773 (16.5)  | < 0.001 |
| Missing <sup>2</sup>                    | 6,680 (10.2)  | 530 (1.5)     | < 0.001 |
| <b>Ethnicity, N (%)</b>                 |               |               |         |
| Hispanic                                | 16,508 (25.2) | 5,971 (17.0)  | < 0.001 |
| Non-Hispanic                            | 39,493 (60.4) | 23,216 (66.3) | < 0.001 |
| Other/Missing <sup>2</sup>              | 9,426 (14.4)  | 5,836 (16.7)  | < 0.001 |
| <b>Hospitalized for COVID-19, N (%)</b> |               |               |         |
| Yes                                     | 12,698 (19.4) | 8,742 (25.0)  | < 0.001 |
| <b>Index date, N (%)</b>                |               |               |         |
| March 2020 – June 2020                  | 19,017 (29.1) | 4,157 (11.9)  | < 0.001 |
| July 2020 – October 2020                | 9,684 (14.8)  | 9,035 (25.8)  | < 0.001 |
| November 2020 – February 2021           | 23,139 (35.4) | 9,343 (26.7)  | < 0.001 |
| March 2021 – June 2021                  | 10,817 (16.5) | 3,916 (11.2)  | < 0.001 |
| July 2021 – October 2021                | 2,770 (4.2)   | 8,572 (24.5)  | < 0.001 |
| <b>Baseline comorbidities, N (%)</b>    |               |               |         |
| Alcohol Abuse                           | 1,153 (1.8)   | 1,436 (4.1)   | < 0.001 |
| Anemia                                  | 7,027 (10.7)  | 7,765 (22.2)  | < 0.001 |
| Arrhythmia                              | 8,036 (12.3)  | 5,413 (15.5)  | < 0.001 |
| Asthma                                  | 6,468 (9.9)   | 4,705 (13.4)  | < 0.001 |
| Cancer                                  | 5,499 (8.4)   | 3,445 (9.8)   | < 0.001 |
| Chronic Kidney Disease                  | 6,011 (9.2)   | 4,265 (12.2)  | < 0.001 |
| Chronic Pulmonary Disorders             | 9,548 (14.6)  | 7,599 (21.7)  | < 0.001 |
| Cirrhosis                               | 749 (1.1)     | 595 (1.7)     | < 0.001 |
| Coagulopathy                            | 3,006 (4.6)   | 2,653 (7.6)   | < 0.001 |
| Congestive Heart Failure                | 4,731 (7.2)   | 4,093 (11.7)  | < 0.001 |
| COPD                                    | 2,641 (4.0)   | 2,935 (8.4)   | < 0.001 |
| Coronary Artery Disease                 | 7,790 (11.9)  | 4,690 (13.4)  | < 0.001 |
| Dementia                                | 1,294 (2.0)   | 1,722 (4.9)   | < 0.001 |
| Diabetes Type 1                         | 575 (0.9)     | 889 (2.5)     | < 0.001 |
| Diabetes Type 2                         | 11,799 (18.0) | 7,767 (22.2)  | < 0.001 |
| End Stage Renal Disease on Dialysis     | 1,741 (2.7)   | 1,156 (3.3)   | < 0.001 |
| Hemiplegia                              | 558 (0.9)     | 842 (2.4)     | < 0.001 |
| HIV                                     | 917 (1.4)     | 368 (1.1)     | < 0.001 |
| Hypertension                            | 23,868 (36.5) | 14,315 (40.9) | < 0.001 |
| Hypertension and Type 1 or 2 Diabetes   | 9,623 (14.7)  | 0 (0.0)       | < 0.001 |
| <b>Diagnosis</b>                        |               |               |         |
| Inflammatory Bowel Disorder             | 670 (1.0)     | 486 (1.4)     | < 0.001 |
| Lupus or Systemic Lupus                 | 468 (0.7)     | 430 (1.2)     | < 0.001 |
| <b>Erythematosis</b>                    |               |               |         |
| Mental Health Disorders                 | 5,380 (8.2)   | 6,942 (19.8)  | < 0.001 |
| Multiple Sclerosis                      | 352 (0.5)     | 177 (0.5)     | 0.53    |
| Parkinson's Disease                     | 314 (0.5)     | 264 (0.8)     | < 0.001 |
| Peripheral vascular disorders           | 3,776 (5.8)   | 3,613 (10.3)  | < 0.001 |
| Pregnant                                | 2,032 (3.1)   | 2,187 (6.2)   | < 0.001 |
| Pulmonary Circulation Disorder          | 787 (1.2)     | 1,205 (3.4)   | < 0.001 |
| Rheumatoid Arthritis                    | 1,002 (1.5)   | 802 (2.3)     | < 0.001 |

|                                             |             |              |         |
|---------------------------------------------|-------------|--------------|---------|
| Seizure/Epilepsy                            | 941 (1.4)   | 1,383 (3.9)  | < 0.001 |
| Severe Obesity (BMI>=40 kg/m <sup>2</sup> ) | 4,206 (6.4) | 4,563 (13.0) | < 0.001 |
| Weight Loss                                 | 1,828 (2.8) | 2,809 (8.0)  | < 0.001 |

257 Notes: BMI, body mass index (calculated as weight in kilograms divided by height in meters squared).<sup>1</sup>  
 258 Other race includes native Hawaiian or other pacific islander, American Indian or Alaska Native, multiple  
 259 race, and all other races.<sup>2</sup> Missing race and ethnicity includes refuse to answer, no information, unknown,  
 260 and missing values.  
 261

### 262 3.2. Incidence of PASC Conditions and Symptoms

263 Table 3 presents incidence of PASC symptoms and conditions in both INSIGHT and  
 264 OneFlorida+ cohorts among all COVID-19 positive patients. Patients from INSIGHT had higher  
 265 incidence of conditions related to nervous, respiratory, circulatory, digestive, and general signs and  
 266 symptoms, and lower incidence of conditions related to blood and endocrine. Incidence of conditions  
 267 related to skin was similar between two CRNs. The differences in incidence of individual PASC  
 268 conditions varied. Conditions with higher relative differences between INSIGHT and OneFlorida+  
 269 included fluid and electrolyte disorders (0.5% vs 4.3%, P<0.001), hair loss (1.2% vs 0.6%, P<0.001),  
 270 pressure ulcer of skin (0.6% vs 1.1%, P<0.001), and acute pharyngitis (1.3% vs 1.9%, P<0.001).

271 **Table 3 Incidence of New Conditions and Symptoms among COVID-19 Patients from INSIGHT**  
 272 **and OneFlorida+**

| PASC conditions and symptoms | INSIGHT (%) | OneFlorida+ (%) | P value |
|------------------------------|-------------|-----------------|---------|
| <b>Nervous</b>               |             |                 |         |
| Encephalopathy               | 1.6         | 2.1             | < 0.001 |
| Dementia                     | 0.8         | 1.1             | < 0.001 |
| Cognitive problems           | 3.5         | 3.4             | 0.49    |
| Sleep disorders              | 3.5         | 3.0             | < 0.001 |
| Headache                     | 3.3         | 3.8             | < 0.001 |
| Any nervous condition        | 9.6         | 8.1             | < 0.001 |
| <b>Skin</b>                  |             |                 |         |
| Hair loss                    | 1.2         | 0.6             | < 0.001 |
| Pressure ulcer of skin       | 0.6         | 1.1             | < 0.001 |
| Any skin conditions          | 1.8         | 1.7             | 0.13    |
| <b>Respiratory</b>           |             |                 |         |
| Pulmonary fibrosis           | 2.6         | 2.5             | 0.17    |
| Dyspnea                      | 11.4        | 9.1             | < 0.001 |
| Acute pharyngitis            | 1.3         | 1.9             | < 0.001 |
| Any respiratory condition    | 13.1        | 10.4            | < 0.001 |
| <b>Circulatory</b>           |             |                 |         |
| Pulmonary embolism           | 0.7         | 1.0             | < 0.001 |
| Thromboembolism              | 1.2         | 1.3             | 0.16    |
| Chest pain                   | 5.6         | 5.1             | 0.005   |
| Abnormal heartbeat           | 5.0         | 4.6             | 0.02    |
| Any circulatory condition    | 8.9         | 8.4             | < 0.001 |

|                                   |      |     |         |
|-----------------------------------|------|-----|---------|
| <b>Blood</b>                      |      |     |         |
| Anemia                            | 3.9  | 4.7 | < 0.001 |
| <b>Endocrine</b>                  |      |     |         |
| Malnutrition                      | 1.3  | 1.9 | < 0.001 |
| Diabetes mellitus                 | 3.0  | 2.5 | < 0.001 |
| Fluid disorders                   | 0.5  | 4.3 | < 0.001 |
| Edema                             | 6.1  | 7.6 | < 0.001 |
| Any endocrine condition           | 8.8  | 9.1 | 0.25    |
| <b>Digestive</b>                  |      |     |         |
| Other constipation                | 3.3  | 2.8 | < 0.001 |
| Abdominal pain                    | 7.8  | 8.2 | 0.07    |
| Any digestive condition           | 9.3  | 8.7 | 0.008   |
| <b>General signs and symptoms</b> |      |     |         |
| Malaise and fatigue               | 4.6  | 5.0 | 0.03    |
| Joint pain                        | 9.7  | 7.4 | < 0.001 |
| Any general signs and symptoms    | 13.0 | 9.5 | < 0.001 |

273

### 274 3.3. Contextual and Spatial Risk Factors for PASC Conditions and Symptoms

275 Figures 1 presents contextual and spatial factors that were significantly ( $q < 0.05$ ) associated with  
 276 having at least one PASC condition or symptom in each organ system from the Phase 1 analysis using  
 277 COVID-19 patients from INSIGHT. One air toxicant factor was associated with respiratory PASC. A  
 278 large group of air toxicant factors had significant associations with PASC related to endocrine, nervous,  
 279 skin, and general signs and symptoms. In addition, food access had statistically significant associations  
 280 with PASC related to endocrine, nervous, skin, and general signs and symptoms. Food access, green  
 281 space, neighborhood deprivation, social capital, and vacant land were associated with PASC conditions  
 282 and symptoms of endocrine, nervous, skin, and general signs and symptoms.

283 Figures 2 presents Phase 1 results using COVID-19 patients from OneFlorida+. Blood and skin  
 284 PASC were each associated with a single air toxicant factor. Similar with INSIGHT, a large set of criteria  
 285 air pollutant and air toxicant characteristics were associated with endocrine and nervous PASC. Many  
 286 criteria air pollutants and air toxicants were associated with circulatory, digestive, and respiratory PASC.  
 287 A smaller set of built and social environment characteristics were associated with of circulatory,  
 288 digestive, endocrine, and respiratory PASC conditions and symptoms among OneFlorida+ patients.

289 Figures 3&4 present significant contextual and spatial risk factors from Phase 2 analysis. Among  
 290 COVID-19 patients from INSIGHT, we found that a higher level of air toxicants was associated with  
 291 PASC conditions related to nervous, skin, and respiratory. Higher levels of methyl methacrylate in the air  
 292 were associated with an increased risk of developing at least one nervous PASC condition (adjusted odds  
 293 ratio [aOR]: 1.04, 95% confidence interval [CI]: 1.01-1.06). Higher neighborhood deprivation was  
 294 associated with an increased risk of developing PASC of endocrine (aOR: 1.08, 95% CI: 1.02-1.15).

295 Using COVID-19 patients from OneFlorida+, we found that PM<sub>2.5</sub> compositions were associated with  
296 increased risk of developing PASC conditions of nervous, circulatory, endocrine, digestive, and general  
297 signs. For example, a higher level of ammonium was associated with an increased risk of developing  
298 circulatory PASC (aOR: 1.10, 95% CI: 1.01-1.20). Many air toxicants were associated with an increased  
299 risk of PASC conditions affecting many organ systems, including nervous, skin, respiratory, blood,  
300 endocrine, digestive, and general signs. Average days addresses no-stat was associated with an increased  
301 risk of developing endocrine and digestive PASC.

### 302 3.4. Contextual and Spatial Risk Factors for Individual PASC Symptoms and Conditions

303 We also identified contextual and spatial risk factors for each individual PASC condition using  
304 the same analytic strategies (eFigures 3-6). Using COVID-19 patients from INSIGHT, we found that  
305 higher level of neighborhood deprivation was associated with increased risk of headache (aOR: 1.09, 95%  
306 CI: 1.02-1.16), chest pain (aOR: 1.07, 95% CI: 1.01-1.07), diabetes (aOR: 1.10, 95% CI: 1.02-1.20), and  
307 joint pain (aOR: 1.06, 95% CI: 1.01-1.11). A set of air toxicants were associated with an increased risk  
308 for encephalopathy, cognitive problems, chest pain, and other PASC conditions. Using COVID-19 from  
309 OneFlorida+ identified a broader set of air toxicants and PM<sub>2.5</sub> compositions associated with an increased  
310 risk for multiple PASC conditions. For example, nitrate and ammonium were associated with an  
311 increased risk of headache, dyspnea, acute pharyngitis, and abdominal pain. Certain built environment  
312 and food access factors were also associated with certain PASC conditions in OneFlorida+ sample. Low  
313 food access of housing unit without vehicle access was associated with increased risk of fatigue (aOR:  
314 1.08, 95% CI: 1.02-1.14).

### 315 3.5. Excessive Risk of Contextual and Spatial Characteristics for PASC Symptoms and Conditions

316 Analyses including COVID-19 negative patients and interaction terms between contextual and  
317 spatial risk factors and COVID-19 status identified several characteristics with excessive risk for PASC  
318 among COVID-19 positive patients relative to negative patients (odds ratio of the interaction term > 1 and  
319  $P < 0.05$ ). For example, we found that 1,2-epoxybutane was associated with excessive risk for respiratory  
320 PASC among COVID-19 positive patients compared with negative patients (aOR: 1.07,  $P < 0.001$ ). For  
321 individual PASC symptoms and conditions, ethylene dibromide was associated with excessive risk for  
322 encephalopathy among COVID-19 positive patients compared with negative patients (aOR: 1.13,  $P <$   
323 0.001). Full results of these analyses are available in the appendix (eTables 3-6).

324

325 **Figure 1 Significant Contextual and Spatial Factors Associated with PASC Groups in Phase 1**

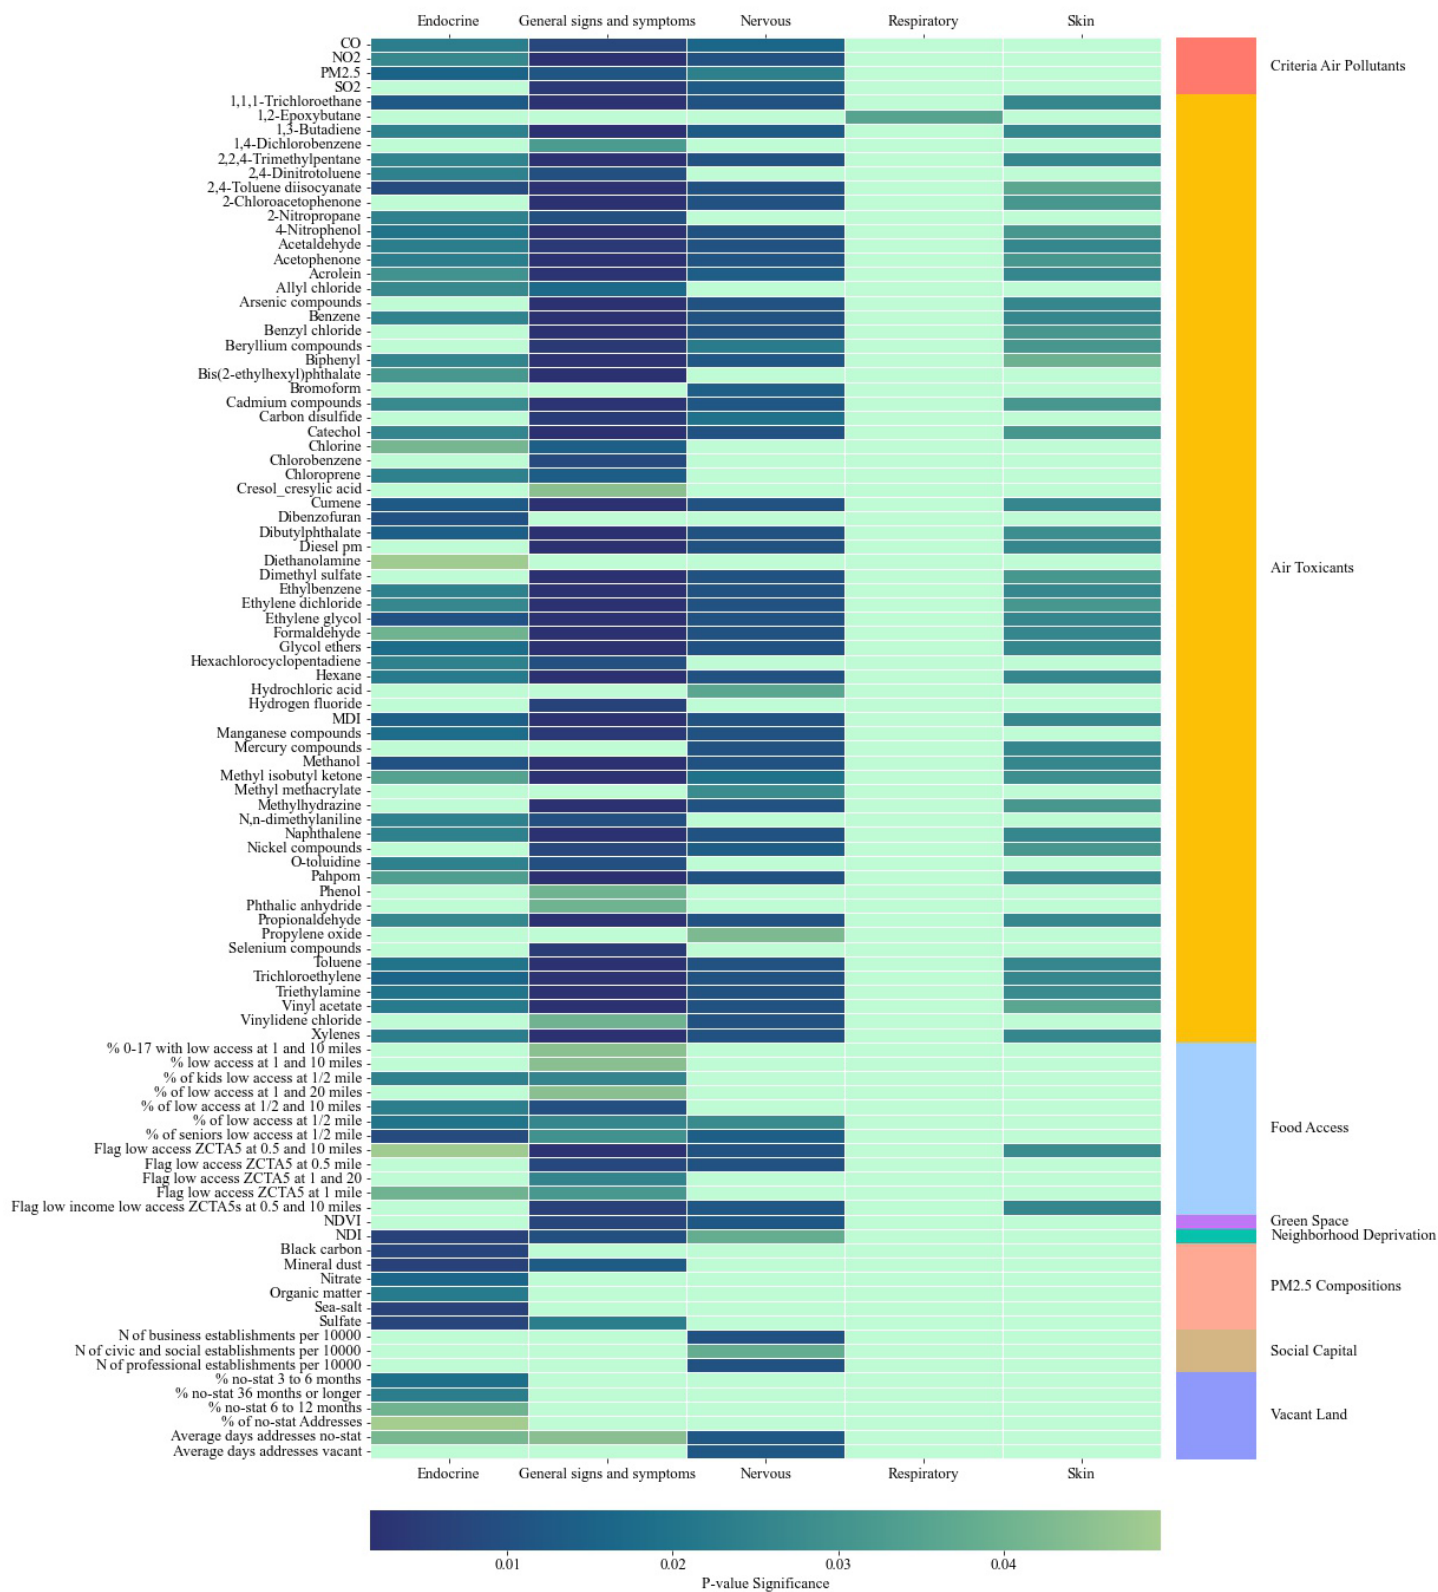

## 326 Analysis Using INSIGHT Sample



327 Notes: Figure represent significant neighborhood and environmental characteristics identified from mixed effects logistic  
 328 regressions where a PASC condition is the outcome and each neighborhood and environmental characteristic is the key  
 329 independent variable. All regressions controlled for patient-level covariates. A neighborhood or environmental characteristic is  
 330 considered significant if the false discovery rate adjusted p value is < 0.05.

331 **Figure 2 Significant Contextual and Spatial Factors Associated with PASC Groups in Phase 1 Analysis Using**  
 332 **OneFlorida+ Sample**

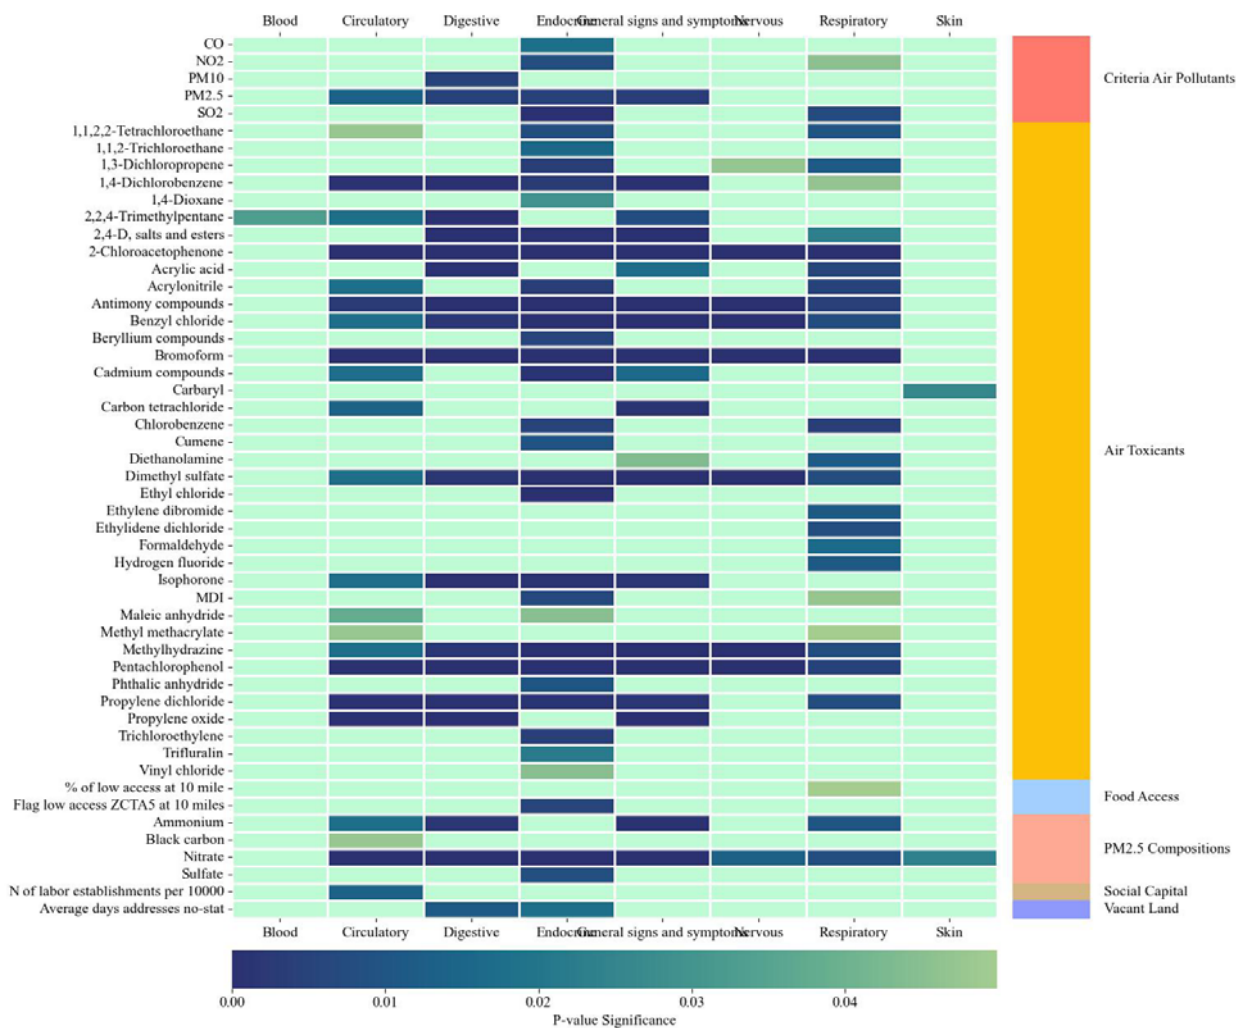

333 Notes: Figure represent significant neighborhood and environmental characteristics identified from mixed effects logistic  
 334 regressions where a PASC condition is the outcome and each neighborhood and environmental characteristic is the key  
 335 independent variable. All regressions controlled for patient-level covariates. A neighborhood and environmental characteristic is  
 336 considered significant if the false discovery rate adjusted p value is < 0.05.

337

338

339

340 **Figure 3 Contextual and Spatial Risk Factors for PASC Conditions by Organ System using**

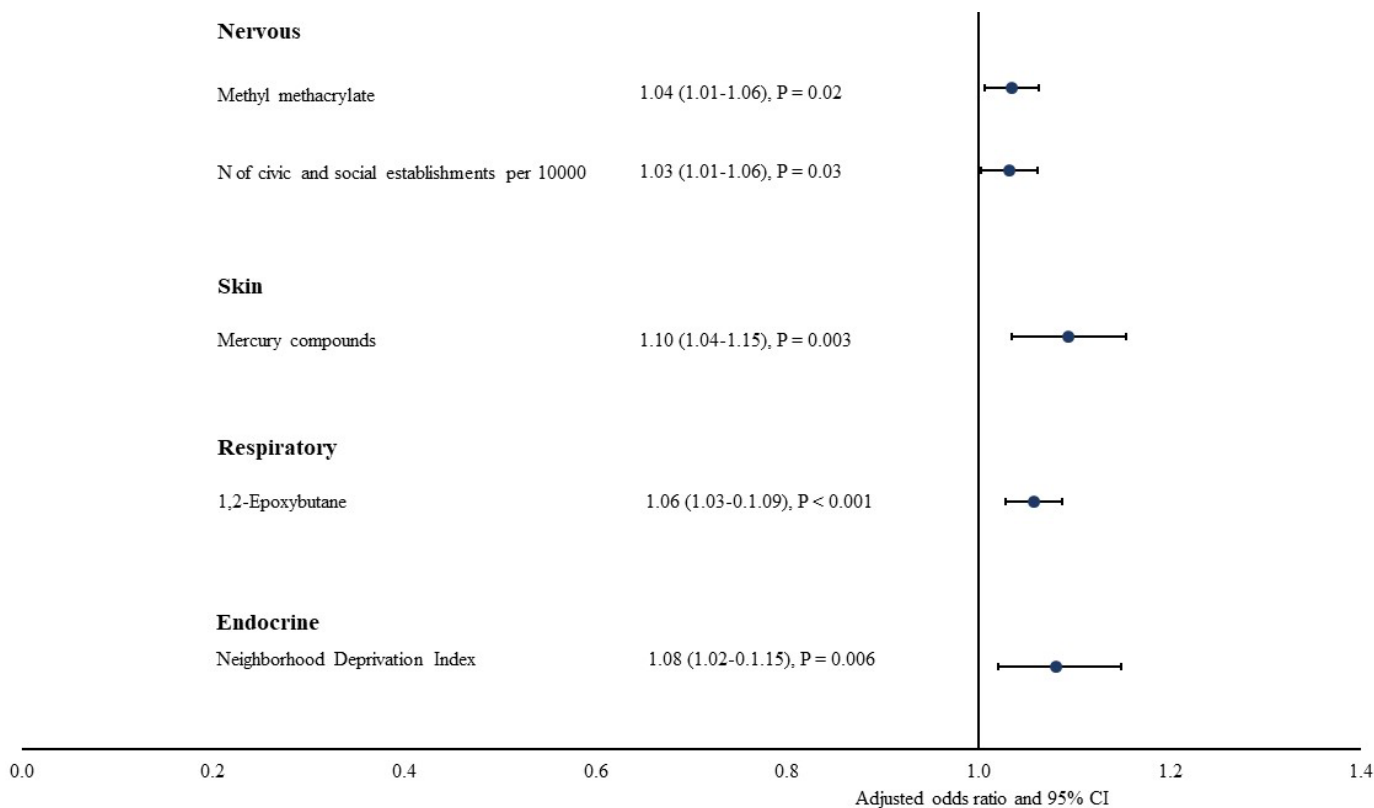

341 **INSIGHT Sample**

342 Notes: NDI: Neighborhood Deprivation Index. ORs were estimated from mixed effects logistic regressions with  
343 ZCTA5 random intercept. Each regression includes all significant neighborhood and environmental characteristics  
344 identified from phase 1 analysis for each PASC outcome, controlling for all patient-level covariates.

345 **Figure 4 Contextual and Spatial Risk Factors for PASC Conditions by Organ System using**

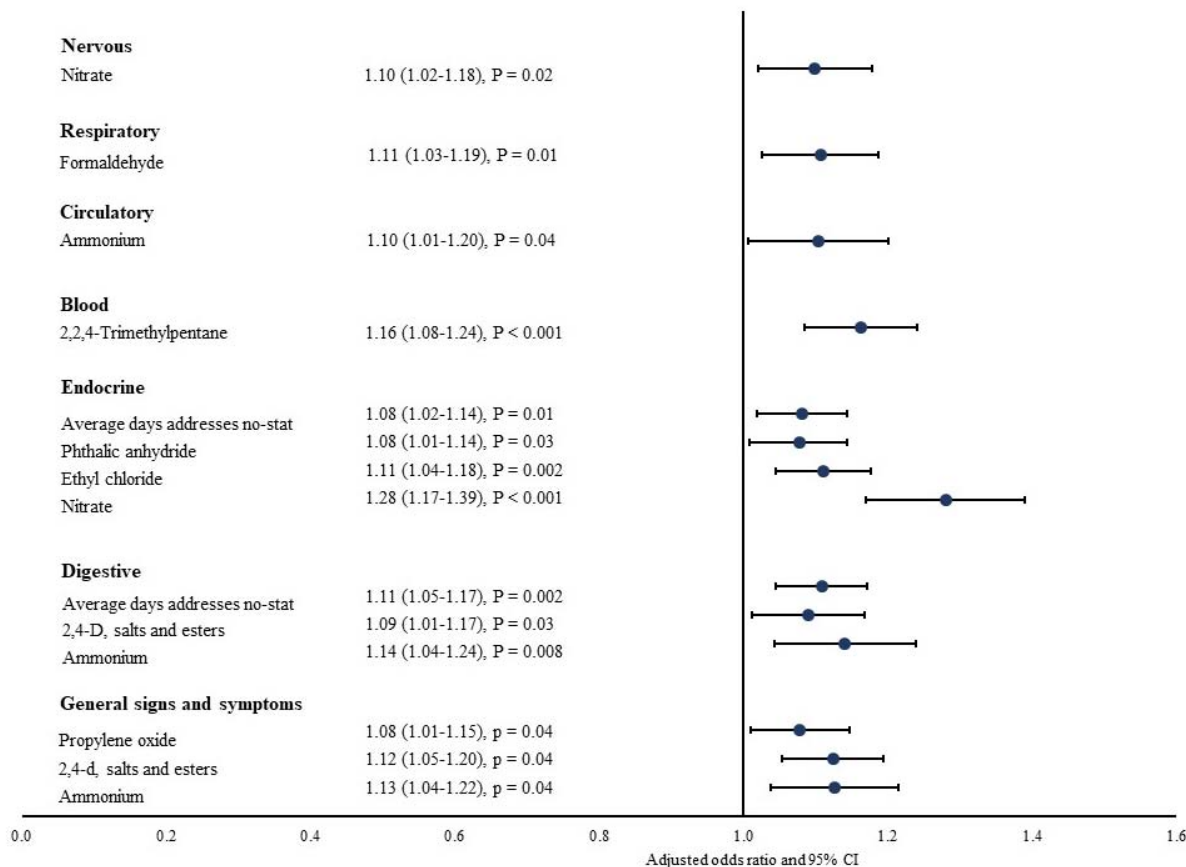

346 **OneFlorida+ Sample**

347 Notes: NDI: Neighborhood Deprivation Index. ORs were estimated from mixed effects logistic regressions with  
 348 ZCTA5 random intercept. Each regression includes all significant neighborhood and environmental characteristics  
 349 identified from phase 1 analysis for each PASC outcome, controlling for all patient-level covariates.

350

351 **4. Discussions**

352 To our knowledge, this is the first study examining contextual and spatial risk factors for a  
 353 comprehensive set of PASC symptoms and conditions. Using large and diverse COVID-19 patient  
 354 samples from two CRNs, we identified ZCTA5-level risk factors from nearly 200 variables for 23 PASC  
 355 conditions of eight organ systems. Risk factors for PASC symptoms and conditions were primarily  
 356 concentrated on air toxicants, overall neighborhood deprivation, and PM<sub>2.5</sub> compositions (e.g., nitrate and  
 357 ammonium). A few built environment characteristics, such as food access, were also associated with  
 358 PASC symptoms and conditions. Our findings indicated significant heterogeneity in contextual and  
 359 spatial risk factors for PASC between the New York City area and Florida.

360 Disadvantaged contextual and spatial characteristics can increase the risk for PASC through  
361 multiple direct and indirect pathways. Long-term exposure to air pollution can directly cause various  
362 symptoms and conditions of central nervous system, respiratory, endocrine, and other organ systems. The  
363 association between air pollution and respiratory conditions has been well established. PM<sub>2.5</sub> is associated  
364 with increased risk of incident asthma, COPD, and other respiratory diseases (Tiotiu et al., 2020; Z.  
365 Zhang et al., 2021). Growing numbers of studies also demonstrate associations between air pollution and  
366 nervous conditions. Air pollution is associated with metabolic abnormalities and oxidative stress in the  
367 brain (H. Kim et al., 2020; Thomson, 2019). Air pollution-induced dysfunction of the insulin signaling  
368 system can reduce cognitive function and increase the risk of dementia (H. Kim et al., 2020; Paul et al.,  
369 2020). People living in neighborhoods of greater deprivation often have fewer financial resources, lower  
370 health literacy, and higher food insecurity, leading to the development of diabetes and other conditions  
371 (M. D. Hu et al., 2021; Kurani et al., 2021). Previous studies found that COVID-19 patients are  
372 disproportionately from areas with disadvantaged neighborhood conditions (Y. Zhang et al., 2021).  
373 Addressing neighborhood and environmental vulnerability is important to help patients recover from  
374 SARS-CoV-2 infection.

375 Compared with the robust evidence on direct health effects of contextual and spatial risk factors,  
376 the interactions between these characteristics and SARS-CoV-2 infection are understudied and may be of  
377 great importance to address. Early evidence indicated that air pollution can modify individuals'  
378 susceptibility to SARS-CoV-2 infection and disease severity (Chen et al., 2022; Pica & Bouvier, 2012;  
379 Weaver et al., 2022). This may be mediated by upregulation of proteins critical to viral entry and by  
380 immune system suppression from oxidative stress, epithelial damage, and pulmonary inflammation (van  
381 der Valk & In 't Veen, 2021; Weaver et al., 2022). Studies found that exposure to particulate matter can  
382 increase the expression of angiotensin-converting enzyme 2 (ACE2) and other proteins critical to SARS-  
383 CoV-2 entry into host cells (Hoffmann et al., 2020; Sagawa et al., 2021). Upregulation of proteins  
384 necessary for viral entry may lead to higher viral load and elevate the risk of severe COVID-19.  
385 Immunological impairment prior to COVID-19 infection, induced by long-term exposure to PM, NO<sub>2</sub>,  
386 and other air pollutants, may also increase the risk of COVID-19 infection and/or its severity (Weaver et  
387 al., 2022). Severe COVID-19 is associated with high inflammation and elevated levels of inflammatory  
388 cytokines, both are important pathophysiologic factors for PASC symptoms and conditions (Mehandru &  
389 Merad, 2022; Nalbandian et al., 2021). Our analyses provided important evidence to this question. Results  
390 indicated that certain contextual and spatial characteristics, particularly air toxicants, were associated with  
391 excessive risk for PASC symptoms and conditions among COVID-19 positive patients compare with  
392 negative patients.

393 We found considerable heterogeneity of contextual and spatial risk factors for PASC between  
394 New York City and Florida. This could be due to different neighborhood and environmental  
395 characteristics between two regions. For example, food access may be easier for patients in New York  
396 area because of the public transportation and urbanity compared with Florida. Therefore, low food access  
397 among households without vehicle access was found to be a risk factor for PASC among patients from  
398 Florida but not in New York area. A recent study also reported different levels of O<sub>3</sub> pollution between  
399 New York and Florida and found different associations between O<sub>3</sub> pollution and COVID-19 infection  
400 (Razzaq et al., 2020). The differential burden of preexisting comorbidities among patients in Florida may  
401 also account for the heterogeneous findings. Patients with a higher burden of pre-existing chronic  
402 conditions may be more susceptible to air pollution induced adverse health effects and therefore are at a  
403 higher risk for PASC (To et al., 2015). Other potential explanations may include variations in vaccination  
404 rate, healthcare utilization pattern, and differing courses of pandemic in these two regions. More research  
405 is needed to extend the analyses to other regions and understand reasons for heterogeneity in contextual  
406 and spatial risk factors for PASC.

407 This study has several major strengths. We were able to account for simultaneous exposure to  
408 multifaceted disadvantaged environmental risk factors by examining a very comprehensive set of  
409 contextual and spatial characteristics. Lack of detailed patient level data has been considered a major  
410 limitation in previous studies examining environmental risk factors and COVID-19 related outcomes  
411 (Weaver et al., 2022). Compared with previous ecologic studies relying on data aggregated at the county  
412 level, we were able to adjust for detailed patient level characteristics (e.g., demographics and pre-existing  
413 comorbidities) as potential confounders. We compared findings between two large COVID-19 patient  
414 cohorts in New York City area and Florida and demonstrated significant heterogeneity in contextual and  
415 spatial risk factors for PASC. This finding provides important implications for public health efforts to  
416 address social risk factors and help patients recover from SARS-CoV-2 infection.

417 Limitations of this study include: (1) we used contextual and spatial characteristics at ZCTA5  
418 level, which may not be granular enough to estimate individuals' exposure to risk factors. This is  
419 particularly an issue in New York City where each ZCTA5 may cover a broad geographic area and a  
420 higher number of residents. (2) Similar with many previous studies, we focused on long-term exposure to  
421 air toxicants instead of acute short-term exposure to these risk factors before SARS-CoV-2 infection.  
422 However, previous evidence indicated that distribution of these air pollutants may have remained  
423 relatively unchanged (Chakraborty, 2021). (3) Some important potential confounders, such as vaccination  
424 status, were not adjusted due to data limitations. (4) We only included patients who sought care from the  
425 health systems affiliated with the two CRNs 31-180 days after SARS-CoV-2 infection. These patients

426 may not be representative of patients in these two regions. (5) Patients who always tested negative might  
427 have had a positive test that was not captured in EHR (e.g., self-test at home). Thus, it is possible that  
428 some patients in the negative group may be tested positive at some point.

## 429 **5. Conclusion**

430 We found that multiple contextual and spatial risk factors, especially certain air pollutants and  
431 toxicants, are significantly associated with an increased risk of PASC conditions that impact multiple  
432 organ systems. These risk factors for PASC symptoms and conditions differed in the New York City area  
433 compared to Florida. Targeting interventions to reduce the burden of PASC among patients with  
434 disadvantaged contextual and spatial characteristics will help to reduce disparities of COVID-19  
435 pandemic.

## 436 **Acknowledge:**

437  
438 This research was funded by the National Institutes of Health (NIH) Agreement OTA HL161847-01  
439 (contract number EHR-01-21) as part of the Researching COVID to Enhance Recovery (RECOVER)  
440 research program.

## References

- Al-Aly, Z., Xie, Y., & Bowe, B. (2021). High-dimensional characterization of post-acute sequelae of COVID-19. *Nature*, 594(7862), 259-264. <https://doi.org/10.1038/s41586-021-03553-9>
- Bell, M. L., Catalfamo, C. J., Farland, L. V., Ernst, K. C., Jacobs, E. T., Klimentidis, Y. C., Jehn, M., & Pogreba-Brown, K. (2021). Post-acute sequelae of COVID-19 in a non-hospitalized cohort: Results from the Arizona CoVHORT. *PLoS One*, 16(8), e0254347. <https://doi.org/10.1371/journal.pone.0254347>
- Bliddal, S., Banasik, K., Pedersen, O. B., Nissen, J., Cantwell, L., Schwinn, M., Tulstrup, M., Westergaard, D., Ullum, H., Brunak, S., Tommerup, N., Feenstra, B., Geller, F., Ostrowski, S. R., Gronbaek, K., Nielsen, C. H., Nielsen, S. D., & Feldt-Rasmussen, U. (2021). Acute and persistent symptoms in non-hospitalized PCR-confirmed COVID-19 patients. *Sci Rep*, 11(1), 13153. <https://doi.org/10.1038/s41598-021-92045-x>
- Blomberg, B., Mohn, K. G., Brokstad, K. A., Zhou, F., Linchusen, D. W., Hansen, B. A., Lartey, S., Onyango, T. B., Kuwelker, K., Saevik, M., Bartsch, H., Tondel, C., Kittang, B. R., Bergen, C.-R. G., Cox, R. J., & Langeland, N. (2021). Long COVID in a prospective cohort of home-isolated patients. *Nat Med*, 27(9), 1607-1613. <https://doi.org/10.1038/s41591-021-01433-3>
- Bull-Otterson, L., Baca, S., Saydah, S., Boehmer, T. K., Adjei, S., Gray, S., & Harris, A. M. (2022). Post-COVID Conditions Among Adult COVID-19 Survivors Aged 18–64 and  $\geq 65$  Years—United States, March 2020–November 2021. *Morbidity and Mortality Weekly Report*, 71(21), 713.
- Carvalho-Schneider, C., Laurent, E., Lemaigen, A., Beaufils, E., Bourbao-Tournois, C., Laribi, S., Flament, T., Ferreira-Maldent, N., Bruyere, F., Stefic, K., Gaudy-Graffin, C., Grammatico-Guillon, L., & Bernard, L. (2021). Follow-up of adults with noncritical COVID-19 two months after symptom onset. *Clin Microbiol Infect*, 27(2), 258-263. <https://doi.org/10.1016/j.cmi.2020.09.052>
- Chakraborty, J. (2021). Convergence of COVID-19 and chronic air pollution risks: Racial/ethnic and socioeconomic inequities in the U.S. *Environmental Research*, 193. <https://doi.org/ARTN.110586>  
10.1016/j.envres.2020.110586
- Chen, Z., Sidell, M. A., Huang, B. Z., Chow, T., Eckel, S. P., Martinez, M. P., Gheissari, R., Lurmann, F., Thomas, D. C., Gilliland, F. D., & Xiang, A. H. (2022). Ambient Air Pollutant Exposures and COVID-19 Severity and Mortality in a Cohort of COVID-19 Patients in Southern California. *Am J Respir Crit Care Med*. <https://doi.org/10.1164/rccm.202108-1909OC>

- Cohen, K., Ren, S., Heath, K., Dasmarinas, M. C., Jubilo, K. G., Guo, Y., Lipsitch, M., & Daugherty, S. E. (2022). Risk of persistent and new clinical sequelae among adults aged 65 years and older during the post-acute phase of SARS-CoV-2 infection: retrospective cohort study. *BMJ*, *376*, e068414. <https://doi.org/10.1136/bmj-2021-068414>
- Davis, H. E., Assaf, G. S., McCorkell, L., Wei, H., Low, R. J., Re'em, Y., Redfield, S., Austin, J. P., & Akrami, A. (2021). Characterizing long COVID in an international cohort: 7 months of symptoms and their impact. *EClinicalMedicine*, *38*, 101019. <https://doi.org/10.1016/j.eclinm.2021.101019>
- Diez Roux, A. V. (2001). Investigating neighborhood and area effects on health. *Am J Public Health*, *91*(11), 1783-1789. <https://doi.org/10.2105/ajph.91.11.1783>
- Garvin, E., Branas, C., Keddem, S., Sellman, J., & Cannuscio, C. (2013). More Than Just An Eyesore: Local Insights And Solutions on Vacant Land And Urban Health. *Journal of Urban Health- Bulletin of the New York Academy of Medicine*, *90*(3), 412-426. <https://doi.org/10.1007/s11524-012-9782-7>
- Groff, D., Sun, A., Ssentongo, A. E., Ba, D. M., Parsons, N., Poudel, G. R., Lekoubou, A., Oh, J. S., Ericson, J. E., Ssentongo, P., & Chinchilli, V. M. (2021). Short-term and Long-term Rates of Postacute Sequelae of SARS-CoV-2 Infection: A Systematic Review. *JAMA Netw Open*, *4*(10), e2128568. <https://doi.org/10.1001/jamanetworkopen.2021.28568>
- Halpin, S. J., McIvor, C., Whyatt, G., Adams, A., Harvey, O., McLean, L., Walshaw, C., Kemp, S., Corrado, J., Singh, R., Collins, T., O'Connor, R. J., & Sivan, M. (2021). Postdischarge symptoms and rehabilitation needs in survivors of COVID-19 infection: A cross-sectional evaluation. *J Med Virol*, *93*(2), 1013-1022. <https://doi.org/10.1002/jmv.26368>
- Hoffmann, M., Kleine-Weber, H., Schroeder, S., Kruger, N., Herrler, T., Erichsen, S., Schiergens, T. S., Herrler, G., Wu, N. H., Nitsche, A., Muller, M. A., Drosten, C., & Pohlmann, S. (2020). SARS-CoV-2 Cell Entry Depends on ACE2 and TMPRSS2 and Is Blocked by a Clinically Proven Protease Inhibitor. *Cell*, *181*(2), 271-280 e278. <https://doi.org/10.1016/j.cell.2020.02.052>
- Hu, H., Zheng, Y., Wen, X., Smith, S. S., Nizomov, J., Fische, J., Hogan, W. R., Shenkman, E. A., & Bian, J. (2021). An external exposome-wide association study of COVID-19 mortality in the United States. *Sci Total Environ*, *768*, 144832. <https://doi.org/10.1016/j.scitotenv.2020.144832>
- Hu, M. D., Lawrence, K. G., Bodkin, M. R., Kwok, R. K., Engel, L. S., & Sandler, D. P. (2021). Neighborhood Deprivation, Obesity, and Diabetes in Residents of the US Gulf Coast. *Am J Epidemiol*, *190*(2), 295-304. <https://doi.org/10.1093/aje/kwaa206>
- Kaushal, R., Hripesak, G., Ascheim, D. D., Bloom, T., Champion, T. R., Jr., Caplan, A. L., Currie, B. P., Check, T., Deland, E. L., Gourevitch, M. N., Hart, R., Horowitz, C. R., Kastenbaum, I., Levin, A. A., Low, A. F., Meissner, P., Mirhaji, P., Pincus, H. A., Scaglione, C., . . . Nyc, C. (2014).



- Changing the research landscape: the New York City Clinical Data Research Network. *J Am Med Assoc*, 21(4), 587-590. <https://doi.org/10.1136/amiainl-2014-002764>
- Kim, H., Kim, W. H., Kim, Y. Y., & Park, H. Y. (2020). Air Pollution and Central Nervous System Disease: A Review of the Impact of Fine Particulate Matter on Neurological Disorders. *Front Public Health*, 8, 575330. <https://doi.org/10.3389/fpubh.2020.575330>
- Kim, S. Y., Bechle, M., Hankey, S., Sheppard, L., Szpiro, A. A., & Marshall, J. D. (2020). Concentrations of criteria pollutants in the contiguous U.S., 1979 - 2015: Role of prediction model parsimony in integrated empirical geographic regression. *PLoS One*, 15(2), e0228535. <https://doi.org/10.1371/journal.pone.0228535>
- Kirby, J. B., Bernard, D., & Liang, L. (2021). The Prevalence of Food Insecurity Is Highest Among Americans for Whom Diet Is Most Critical to Health. *Diabetes Care*, 44(6), e131-e132. <https://doi.org/10.2337/dc20-3116>
- Kurani, S. S., Lampman, M. A., Funni, S. A., Giblon, R. E., Inselman, J. W., Shah, N. D., Allen, S., Rushlow, D., & McCoy, R. G. (2021). Association Between Area-Level Socioeconomic Deprivation and Diabetes Care Quality in US Primary Care Practices. *JAMA Netw Open*, 4(12), e2138438. <https://doi.org/10.1001/jamanetworkopen.2021.38438>
- Lin, W., Jiang, R., Wu, J., Wei, S., Yin, L., Xiao, X., Hu, S., Shen, Y., & Ouyang, G. (2019). Sorption properties of hydrophobic organic chemicals to micro-sized polystyrene particles. *Sci Total Environ*, 690, 565-572. <https://doi.org/10.1016/j.scitotenv.2019.06.537>
- Logue, J. M., Small, M. J., & Robinson, A. L. (2011). Evaluating the national air toxics assessment (NATA): Comparison of predicted and measured air toxics concentrations, risks, and sources in Pittsburgh, Pennsylvania. *Atmospheric Environment*, 45(2), 476-484. <https://doi.org/10.1016/j.atmosenv.2010.09.053>
- Mehandru, S., & Merad, M. (2022). Pathological sequelae of long-haul COVID. *Nat Immunol*, 23(2), 194-202. <https://doi.org/10.1038/s41590-021-01104-y>
- Nalbandian, A., Sehgal, K., Gupta, A., Madhavan, M. V., McGroder, C., Stevens, J. S., Cook, J. R., Nordvig, A. S., Shalev, D., Sehrawat, T. S., Ahluwalia, N., Bikdeli, B., Dietz, D., Der-Nigoghossian, C., Liyanage-Don, N., Rosner, G. F., Bernstein, E. J., Mohan, S., Beckley, A. A., . . . Wan, E. Y. (2021). Post-acute COVID-19 syndrome. *Nat Med*, 27(4), 601-615. <https://doi.org/10.1038/s41591-021-01283-z>
- Paul, K. C., Haan, M., Yu, Y., Inoue, K., Mayeda, E. R., Dang, K., Wu, J., Jerrett, M., & Ritz, B. (2020). Traffic-Related Air Pollution and Incident Dementia: Direct and Indirect Pathways Through Metabolic Dysfunction. *J Alzheimers Dis*, 76(4), 1477-1491. <https://doi.org/10.3233/JAD-200320>

- Petersen, M. S., Kristiansen, M. F., Hanusson, K. D., Danielsen, M. E., B, A. S., Gaini, S., Strom, M., & Weihe, P. (2021). Long COVID in the Faroe Islands: A Longitudinal Study Among Nonhospitalized Patients. *Clin Infect Dis*, 73(11), e4058-e4063. <https://doi.org/10.1093/cid/ciaa1792>
- Petroni, M., Hill, D., Younes, L., Barkman, L., Howard, S., Howell, I. B., Mirowsky, J., & Collins, M. B. (2020). Hazardous air pollutant exposure as a contributing factor to COVID-19 mortality in the United States. *Environmental Research Letters*, 15(9). <https://doi.org/ARTN.0940a9>  
10.1088/1748-9326/abaf86
- Pica, N., & Bouvier, N. M. (2012). Environmental factors affecting the transmission of respiratory viruses. *Curr Opin Virol*, 2(1), 90-95. <https://doi.org/10.1016/j.coviro.2011.12.003>
- Razzaq, A., Sharif, A., Aziz, N., Irfan, M., & Jermstipparsert, K. (2020). Asymmetric link between environmental pollution and COVID-19 in the top ten affected states of US: A novel estimations from quantile-on-quantile approach. *Environmental Research*, 191. <https://doi.org/ARTN.110189>  
10.1016/j.envres.2020.110189
- Rhew, I. C., Vander Stoep, A., Kearney, A., Smith, N. L., & Dunbar, M. D. (2011). Validation of the normalized difference vegetation index as a measure of neighborhood greenness. *Ann Epidemiol*, 21(12), 946-952. <https://doi.org/10.1016/j.annepidem.2011.09.001>
- Rupasingha, A., Goetz, S. J., & Freshwater, D. (2006). The production of social capital in US counties. *The journal of socio-economics*, 35(1), 83-101.
- Sagawa, T., Tsujikawa, T., Honda, A., Miyasaka, N., Tanaka, M., Kida, T., Hasegawa, K., Okuda, T., Kawahito, Y., & Takano, H. (2021). Exposure to particulate matter upregulates ACE2 and TMPRSS2 expression in the murine lung. *Environ Res*, 195, 110722. <https://doi.org/10.1016/j.envres.2021.110722>
- Shenkman, E., Hurt, M., Hogan, W., Carrasquillo, O., Smith, S., Brickman, A., & Nelson, D. (2018). OneFlorida Clinical Research Consortium: Linking a Clinical and Translational Science Institute With a Community-Based Distributive Medical Education Model. *Acad Med*, 93(3), 451-455. <https://doi.org/10.1097/ACM.0000000000002029>
- Shoucri, S. M., Purpura, L., DeLaurentis, C., Adan, M. A., Theodore, D. A., Irace, A. L., Robbins-Juarez, S. Y., Khedagi, A. M., Letchford, D., Harb, A. A., Zerihun, L. M., Lee, K. E., Gambina, K., Lauranting, M. C., Chen, N., Sperring, C. P., Mehta, S. S., Myers, E. L., Shih, H., . . . Zucker, J. E. (2021). Characterising the long-term clinical outcomes of 1190 hospitalised patients with COVID-19 in New York City: a retrospective case series. *BMJ Open*, 11(6), e049488. <https://doi.org/10.1136/bmjopen-2021-049488>

- Smith, K. R., Corvalan, C. F., & Kjellstrom, T. (1999). How much global ill health is attributable to environmental factors? *Epidemiology*, *10*(5), 573-584.  
<https://www.ncbi.nlm.nih.gov/pubmed/10468437>
- Su, Y., Yuan, D., Chen, D. G., Ng, R. H., Wang, K., Choi, J., Li, S., Hong, S., Zhang, R., Xie, J., Kornilov, S. A., Scherler, K., Pavlovitch-Bedzyk, A. J., Dong, S., Lausted, C., Lee, I., Fallen, S., Dai, C. L., Baloni, P., . . . Heath, J. R. (2022). Multiple early factors anticipate post-acute COVID-19 sequelae. *Cell*, *185*(5), 881-895 e820. <https://doi.org/10.1016/j.cell.2022.01.014>
- Sudre, C. H., Murray, B., Varsavsky, T., Graham, M. S., Penfold, R. S., Bowyer, R. C., Pujol, J. C., Klaser, K., Antonelli, M., Canas, L. S., Molteni, E., Modat, M., Jorge Cardoso, M., May, A., Ganesh, S., Davies, R., Nguyen, L. H., Drew, D. A., Astley, C. M., . . . Steves, C. J. (2021). Attributes and predictors of long COVID. *Nat Med*, *27*(4), 626-631.  
<https://doi.org/10.1038/s41591-021-01292-y>
- Taquet, M., Dercon, Q., Luciano, S., Geddes, J. R., Husain, M., & Harrison, P. J. (2021). Incidence, co-occurrence, and evolution of long-COVID features: A 6-month retrospective cohort study of 273,618 survivors of COVID-19. *PLoS Med*, *18*(9), e1003773.  
<https://doi.org/10.1371/journal.pmed.1003773>
- Thompson, E. J., Williams, D. M., Walker, A. J., Mitchell, R. E., Niedzwiedz, C. L., Yang, T. C., Huggins, C. F., Kwong, A. S. F., Silverwood, R. J., Di Gessa, G., Bowyer, R. C. E., Northstone, K., Hou, B., Green, M. J., Dodgeon, B., Doores, K. J., Duncan, E. L., Williams, F. M. K., Open, S. C., . . . Steves, C. J. (2022). Long COVID burden and risk factors in 10 UK longitudinal studies and electronic health records. *Nat Commun*, *13*(1), 3528. <https://doi.org/10.1038/s41467-022-30836-0>
- Thomson, E. M. (2019). Air Pollution, Stress, and Allostatic Load: Linking Systemic and Central Nervous System Impacts. *J Alzheimers Dis*, *69*(3), 597-614. <https://doi.org/10.3233/JAD-190015>
- Tiotiu, A. I., Novakova, P., Nedeva, D., Chong-Neto, H. J., Novakova, S., Steiropoulos, P., & Kowal, K. (2020). Impact of Air Pollution on Asthma Outcomes. *Int J Environ Res Public Health*, *17*(17).  
<https://doi.org/10.3390/ijerph17176212>
- Tischer, C., Gascon, M., Fernandez-Somoano, A., Tardon, A., Lertxundi Materola, A., Ibarluzea, J., Ferrero, A., Estarlich, M., Cirach, M., Vrijheid, M., Fuertes, E., Dalmau-Bueno, A., Nieuwenhuijsen, M. J., Anto, J. M., Sunyer, J., & Davdand, P. (2017). Urban green and grey space in relation to respiratory health in children. *Eur Respir J*, *49*(6).  
<https://doi.org/10.1183/13993003.02112-2015>

- To, T., Feldman, L., Simatovic, J., Gershon, A. S., Dell, S., Su, J., Foty, R., & Licskai, C. (2015). Health risk of air pollution on people living with major chronic diseases: a Canadian population-based study. *BMJ Open*, 5(9), e009075. <https://doi.org/10.1136/bmjopen-2015-009075>
- United States Department of Agriculture. (2019). *Food Environment Atlas*. Retrieved 05/01 from <https://www.ers.usda.gov/foodatlas/>
- van der Valk, J. P. M., & In 't Veen, J. (2021). The Interplay Between Air Pollution and Coronavirus Disease (COVID-19). *J Occup Environ Med*, 63(3), e163-e167. <https://doi.org/10.1097/JOM.0000000000002143>
- van Donkelaar, A., Martin, R. V., Li, C., & Burnett, R. T. (2019). Regional Estimates of Chemical Composition of Fine Particulate Matter Using a Combined Geoscience-Statistical Method with Information from Satellites, Models, and Monitors. *Environ Sci Technol*, 53(5), 2595-2611. <https://doi.org/10.1021/acs.est.8b06392>
- Walker, A. F., Hu, H., Cuttriss, N., Anez-Zabala, C., Yabut, K., Haller, M. J., & Maahs, D. M. (2020). The Neighborhood Deprivation Index and Provider Geocoding Identify Critical Catchment Areas for Diabetes Outreach. *J Clin Endocrinol Metab*, 105(9). <https://doi.org/10.1210/clinem/dgaa462>
- Wang, L., Foer, D., MacPhaul, E., Lo, Y. C., Bates, D. W., & Zhou, L. (2022). PASClex: A comprehensive post-acute sequelae of COVID-19 (PASC) symptom lexicon derived from electronic health record clinical notes. *J Biomed Inform*, 125, 103951. <https://doi.org/10.1016/j.jbi.2021.103951>
- Watson, K. B., Whitfield, G. P., Thomas, J. V., Berrigan, D., Fulton, J. E., & Carlson, S. A. (2020). Associations between the National Walkability Index and walking among US Adults - National Health Interview Survey, 2015. *Preventive Medicine*, 137. <https://doi.org/ARTN106122>  
10.1016/j.ypmed.2020.106122
- Weaver, A. K., Head, J. R., Gould, C. F., Carlton, E. J., & Remais, J. V. (2022). Environmental Factors Influencing COVID-19 Incidence and Severity. *Annu Rev Public Health*, 43, 271-291. <https://doi.org/10.1146/annurev-publhealth-052120-101420>
- Wu, X., Nethery, R. C., Sabath, M. B., Braun, D., & Dominici, F. (2020). Air pollution and COVID-19 mortality in the United States: Strengths and limitations of an ecological regression analysis. *Sci Adv*, 6(45). <https://doi.org/10.1126/sciadv.abd4049>
- Xie, Y., Bowe, B., & Al-Aly, Z. (2021). Burdens of post-acute sequelae of COVID-19 by severity of acute infection, demographics and health status. *Nat Commun*, 12(1), 6571. <https://doi.org/10.1038/s41467-021-26513-3>
- Yoo, S. M., Liu, T. C., Motwani, Y., Sim, M. S., Viswanathan, N., Samras, N., Hsu, F., & Wenger, N. S. (2022). Factors Associated with Post-Acute Sequelae of SARS-CoV-2 (PASC) After Diagnosis

- of Symptomatic COVID-19 in the Inpatient and Outpatient Setting in a Diverse Cohort. *J Gen Intern Med*. <https://doi.org/10.1007/s11606-022-07523-3>
- Zang, C., Zhang, Y., Xu, J., Bian, J., Morozyuk, D., Schenck, E., Khullar, D., Nordvig, A. S., Shenkman, E., Rothman, R. L., Block, J. P., Lyman, K., Weiner, M., Carton, T. W., Wang, F., & Kaushal, R. (2022). Understanding Post-Acute Sequelae of SARS-CoV-2 Infection through Data-Driven Analysis with Longitudinal Electronic Health Records: Findings from the RECOVER Initiative. <https://doi.org/medRxiv> doi: <https://doi.org/10.1101/2022.05.21.22275420>
- Zhang, Y., Khullar, D., Wang, F., Steel, P., Wu, Y., Orlander, D., Weiner, M., & Kaushal, R. (2021). Socioeconomic variation in characteristics, outcomes, and healthcare utilization of COVID-19 patients in New York City. *PLoS One*, *16*(7), e0255171. <https://doi.org/10.1371/journal.pone.0255171>
- Zhang, Z., Weichenthal, S., Kwong, J. C., Burnett, R. T., Hatzopoulou, M., Jerrett, M., van Donkelaar, A., Bai, L., Martin, R. V., Copes, R., Lu, H., Lakey, P., Shiraiwa, M., & Chen, H. (2021). A Population-Based Cohort Study of Respiratory Disease and Long-Term Exposure to Iron and Copper in Fine Particulate Air Pollution and Their Combined Impact on Reactive Oxygen Species Generation in Human Lungs. *Environ Sci Technol*, *55*(6), 3807-3818. <https://doi.org/10.1021/acs.est.0c05931>
- Zhou, X., Josey, K., Kamareddine, L., Caine, M. C., Liu, T., Mickley, L. J., Cooper, M., & Dominici, F. (2021). Excess of COVID-19 cases and deaths due to fine particulate matter exposure during the 2020 wildfires in the United States. *Sci Adv*, *7*(33). <https://doi.org/10.1126/sciadv.abi8789>
